# Supplementary material for: Intracellular Staphylococcus aureus Infection Decreases Milk Protein Synthesis by Preventing Amino Acid Uptake in Bovine Mammary Epithelial Cells
Source: Frontiers journal article supplement (doi:10.3389/fvets.2021.756375), 2021-11-16
Supplement: Data_Sheet_1.pdf [file Data_Sheet_1.pdf]

Supplementary File 1

Prediction of putative transcription factor binding sites (TFBS) and the transcription factor binding motifs (TFBM) of the transcription factor NF-κB and STAT5 in the promoter sequence of the *SLC1A3* and *SLC7A5*.

The TFBS of NF-κB and STAT5 was analyzed in the promoter sequence of the *SLC1A3* and *SLC7A5* by bioinformatics analysis using the UCSC Genome Browser (<http://genome.ucsc.edu/index.html>) and the PROMO database ([http://algggen.lsi.upc.es/cgi-bin/promo\\_v3/promo/promoinit.cgi?dirDB=TF\\_8.3](http://algggen.lsi.upc.es/cgi-bin/promo_v3/promo/promoinit.cgi?dirDB=TF_8.3)), and as a result, the TFBS of the NF-κB was found in the promoter sequence of the *SLC1A3* (Figure S2(A)) and *SLC7A5* (Figure S2(B)), respectively. The TFBS of the STAT5 was found in the promoter sequence of the *SLC1A3* (Figure S2(C)) and *SLC7A5* (Figure S2(D)), respectively. The UCSC Genome Browser was used to find the promoter sequences of the *SLC1A3* and *SLC7A5*, and the PROMO database was used to identify the putative transcription factor binding sites (TFBS) of NF-κB and STAT5 in the promoter sequence of *SLC1A3* and *SLC7A5*, respectively. The transcription factor NF-κB and STAT5 was predicted within a dissimilarity margin less or equal than 15%.

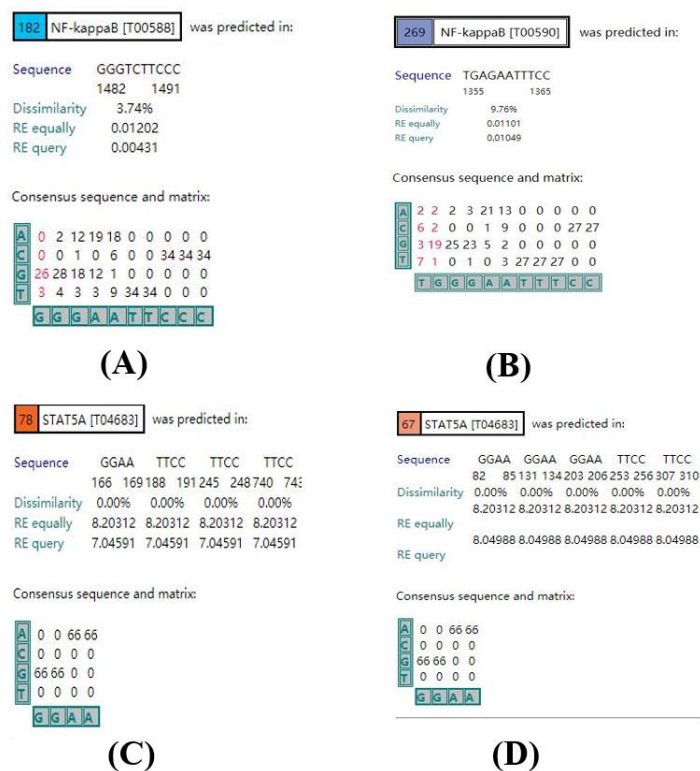

**FIGURE S4** The putative transcription factor binding sites (TFBS) of NF-κB and STAT5 in the promoter sequence of *SLC1A3* and *SLC7A5*.

(A) The NF-κB TFBS in the promoter sequence of *SLC1A3*.

(B) The NF- $\kappa$ B TFBS in the promoter sequence of *SLC7A5*.

(C) The STAT5a TFBS in the promoter sequence of *SLC1A3*.

(D) The STAT5a TFBS in the promoter sequence of *SLC7A5*.

The TFBM of NF- $\kappa$ B and STAT5 were predicted in the promoter sequence of the *SLC1A3* and *SLC7A5* by bioinformatics analysis using the Eukaryotic Promoter Database (<https://epd.epfl.ch//index.php>) and the Jaspar Database (<http://jaspar.genereg.net/>). The promoter sequences were selected from -2000 to 100 bp relative to TSS and a cut-off, using Eukaryotic Promoter Database. The TFBM of the NF- $\kappa$ B and STAT5 were defined by Jaspar Database, respectively. And as a consequence, the motifs of the NF- $\kappa$ B was found in the promoter sequence of the *SLC1A3* (Figure S3(A)), *SLC7A5* (Figure S3(B)), and the motifs of the STAT5 was found in the promoter sequence of the *SLC1A3* (Figure S3(C)) and *SLC7A5* (Figure S3(D)) ( $p < 0.001$ ). The TFBM of NF- $\kappa$ B of Jaspar Database (E) and the TFBM of STAT5a of Jaspar Database (F) were exhibited.

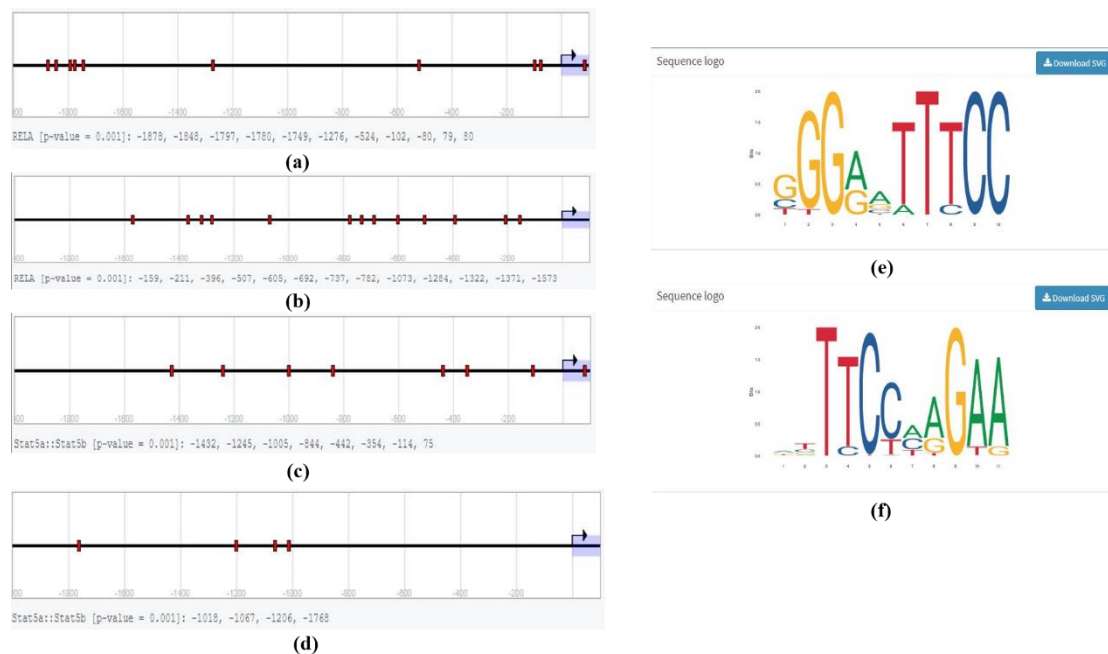

**FIGURE S5** The putative transcription factor binding motifs (TFBM) of NF- $\kappa$ B and STAT5 in the promoter sequence of *SLC1A3* and *SLC7A5* (Red boxes represent motif). (A) The NF- $\kappa$ B TFBM in the promoter sequence of *SLC1A3* (-1878, -1848, -1797, -1780, -1749, -1276, -524, -102, -80, 79, 80,  $p < 0.001$ ). (B) The NF- $\kappa$ B TFBM in the promoter sequence of *SLC7A5* (-159, -211, -396, -507, -605, -692, -737, -782, -1073, -1284, -1322, -1371, -1573,  $p < 0.001$ ). (C) The STAT5 TFBM in the promoter sequence of *SLC1A3* (-1432, -1254, -1005, -844, -442, -354, -114, 75,  $p < 0.001$ ). (D) The STAT5 TFBM in the promoter sequence of *SLC7A5* (-1018, -1067, -1206, -1768,  $p < 0.001$ ). (E) The TFBM of NF- $\kappa$ B of Jaspar Database. (F) The TFBM of STAT5 of Jaspar Database.

Table S1 The target genes and primers for qPCR

| Name                        | Sequence (5'- 3')         |
|-----------------------------|---------------------------|
| <i>SLC1A3</i> (NM_174600.2) | P1:GGAGAGATTCCAGCAAGG     |
|                             | P2:TTCTGTATGGTCGGAGGGT    |
| <i>SLC7A5</i> (NM_174613.2) | P1:GCCGTGTGTGGCGTGTTCCTC  |
|                             | P2:GTAGGTGGCGAAGACGAGCG   |
| <i>ACTB</i> (NM_173979.3)   | P1:CACCACGGCCGAGCGGGAAATC |
|                             | P2:AGAGCCTCAGGGCAGCGGAACC |

Table S2 The colon number of *S. aureus* in BMECs and cells medium ( $\bar{x} \pm SD$ )

| Infection time               |             | 2 h                          | 4 h                           | 8 h                          |
|------------------------------|-------------|------------------------------|-------------------------------|------------------------------|
| <i>S. aureus</i><br>(CFU/mL) | cell medium | 0                            | 0                             | 0                            |
|                              | cell lysate | $(1.50 \pm 0.2) \times 10^3$ | $(3.03 \pm 0.25) \times 10^3$ | $(5.13 \pm 0.8) \times 10^3$ |
